# Supplementary material for: Interconnectivity vs. isolation of prokaryotic communities in European deep-sea mud volcanoes
Source: Copernicus journal article supplement (doi:10.5194/bg-10-2821-2013), 2013-05-02
Supplement: Supplementary file 1 [file pachiadaki_bgs_suppl.doc]

**Interconnectivity vs. isolation of prokaryotic communities in European deep-sea
mud volcanoes**

Maria G. Pachiadaki, Konstantinos Ar. Kormas

SUPPLEMENTARY MATERIAL

Submitted to «Biogeosciences»

**Table S1**. Number of shared and total bacterial (BAC, grey) and archaeal (ARC, purple) operational taxonomic units (OTUs) between the different sites

|  |  |  |  |  |  |  |  |  |  | Bac. total OTUs |
| --- | --- | --- | --- | --- | --- | --- | --- | --- | --- | --- |
|  |  | 37 | 22 | 11 | 4 | 23 | 2 | 12 | AMSMV Pac | 213 |
|  | 12 |  | 19 | 6 | 3 | 16 | 2 | 7 | KZNMV Pac | 176 |
|  | 5 | 4 |  | 6 | 2 | 8 | 1 | 7 | AMSMV Heij | 92 |
|  | 6 | 4 | 4 |  | 1 | 6 | 1 | 4 | KZNMV Heij | 176 |
|  | 3 | 2 | 3 | 5 |  | 4 | 1 | 1 | HMMV Los | 60 |
|  | 3 | 5 | 2 | 3 | 1 |  | 1 | 7 | NDSF Omo | 202 |
|  | 6 | 5 | 3 | 2 | 1 | 3 |  | 0 | GoC Nie | 11 |
|  | 6 | 5 | 3 | 3 | 2 | 4 | 3 |  | GoC Mai | 82 |
|  | AMSMV Pac | KZNMV Pac | AMSMV Heij | KZNMV Heij | HMMV Los | NDSF Omo | GoC Nie | GoC Mai |  |  |
| ARC total OTUs | 25 | 19 | 29 | 45 | 13 | 37 | 9 | 24 |  |  |


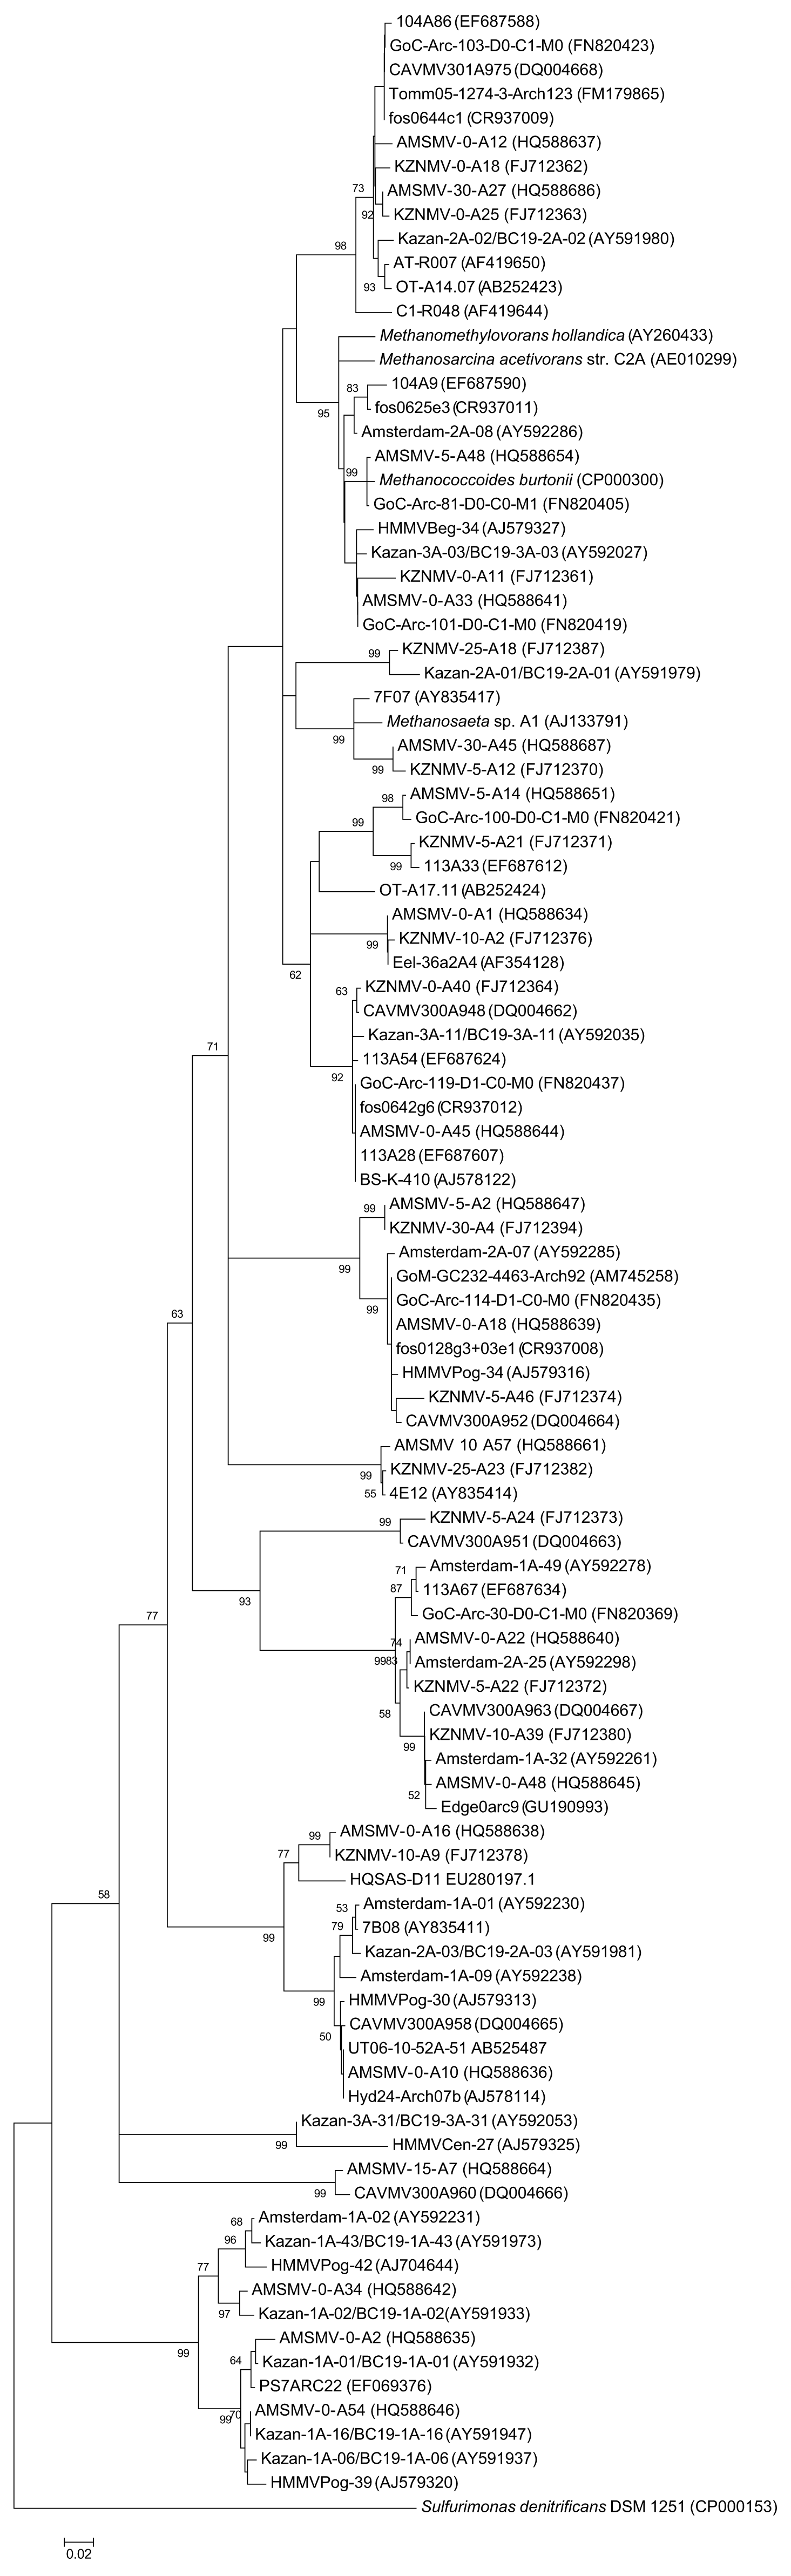


**Figure S1**. Phylogenetic tree of the Archaea 16S rRNA gene sequences (ca. 1300 bp) shared between the investigated mud volcanoes, based on the neighbour-joining method as determined by distance Jukes-Cantor analysis. One thousand bootstrap analyses (distance) were conducted and percentages greater than 50% is indicated at nodes. GenBank accession numbers are in brackets. Scale bar represents 2% estimated distance.


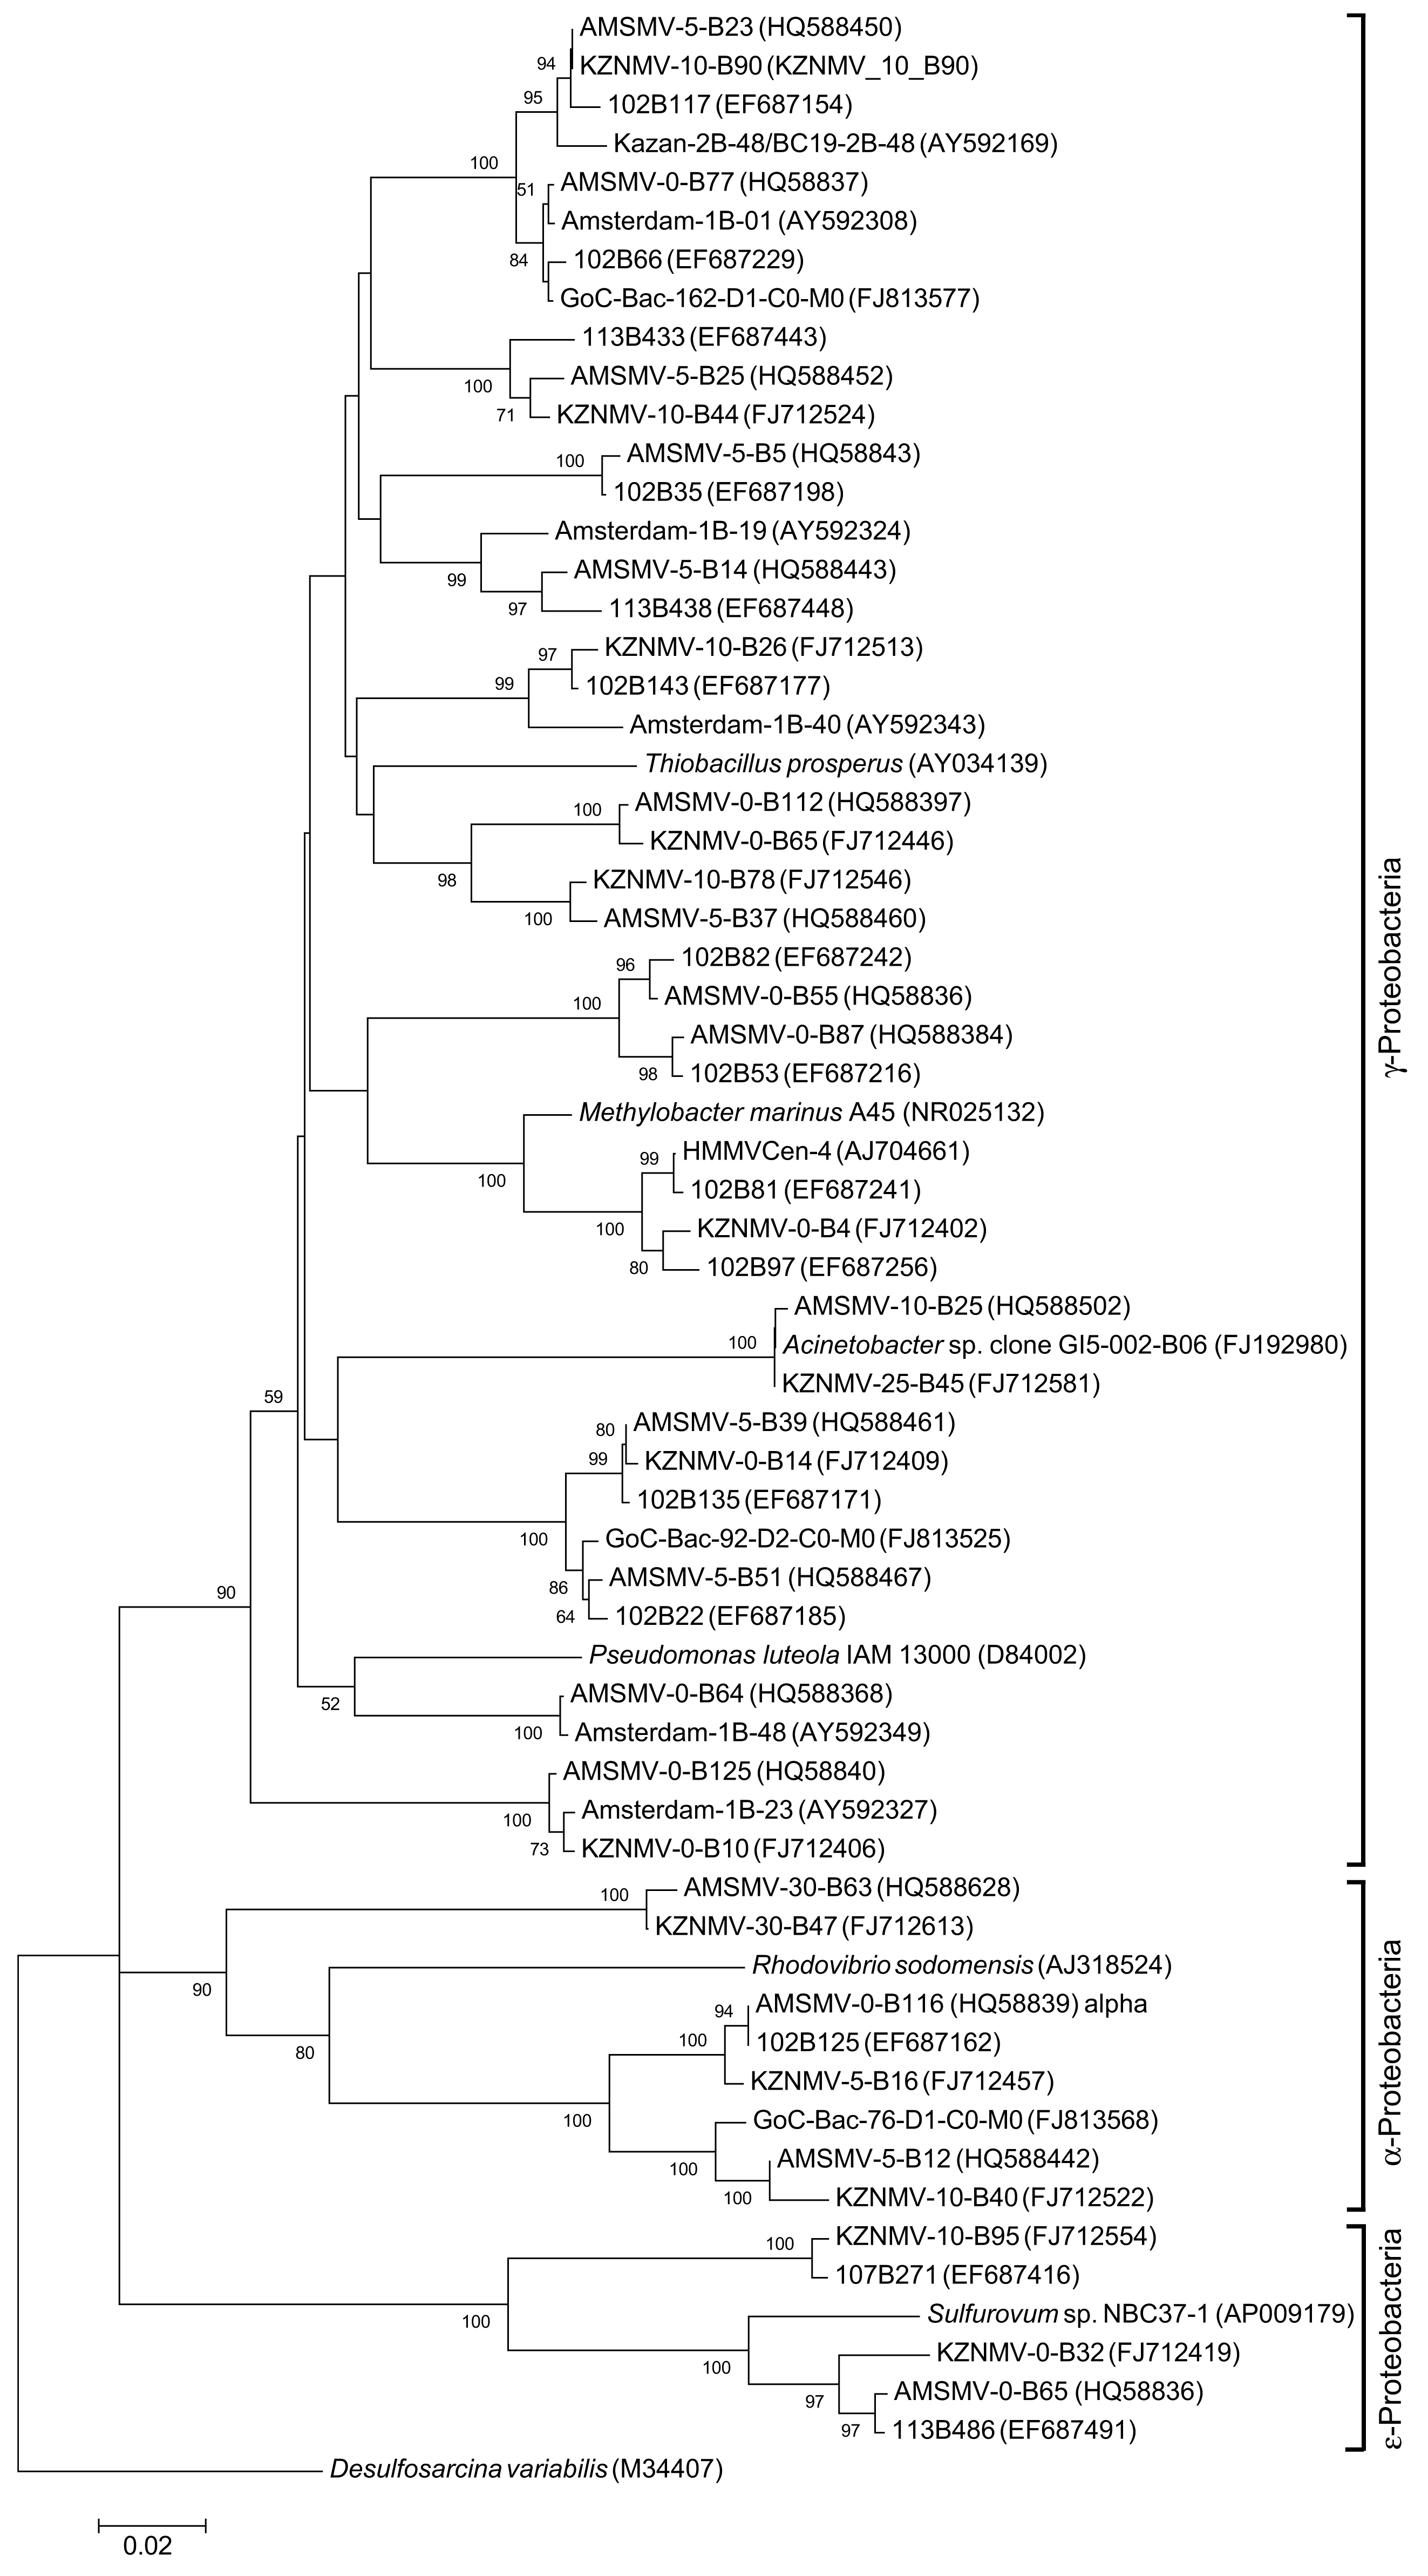


**Figure S2**. Phylogenetic tree of the α-, γ- and ε-Proteobacteria16S rRNA gene sequences (ca. 700 bp) shared between the investigated mud volcanoes, based on the neighbour-joining method as determined by distance Jukes-Cantor analysis. One thousand bootstrap analyses (distance) were conducted and percentages greater than 50% is indicated at nodes. GenBank accession numbers are in brackets. Scale bar represents 2% estimated distance.


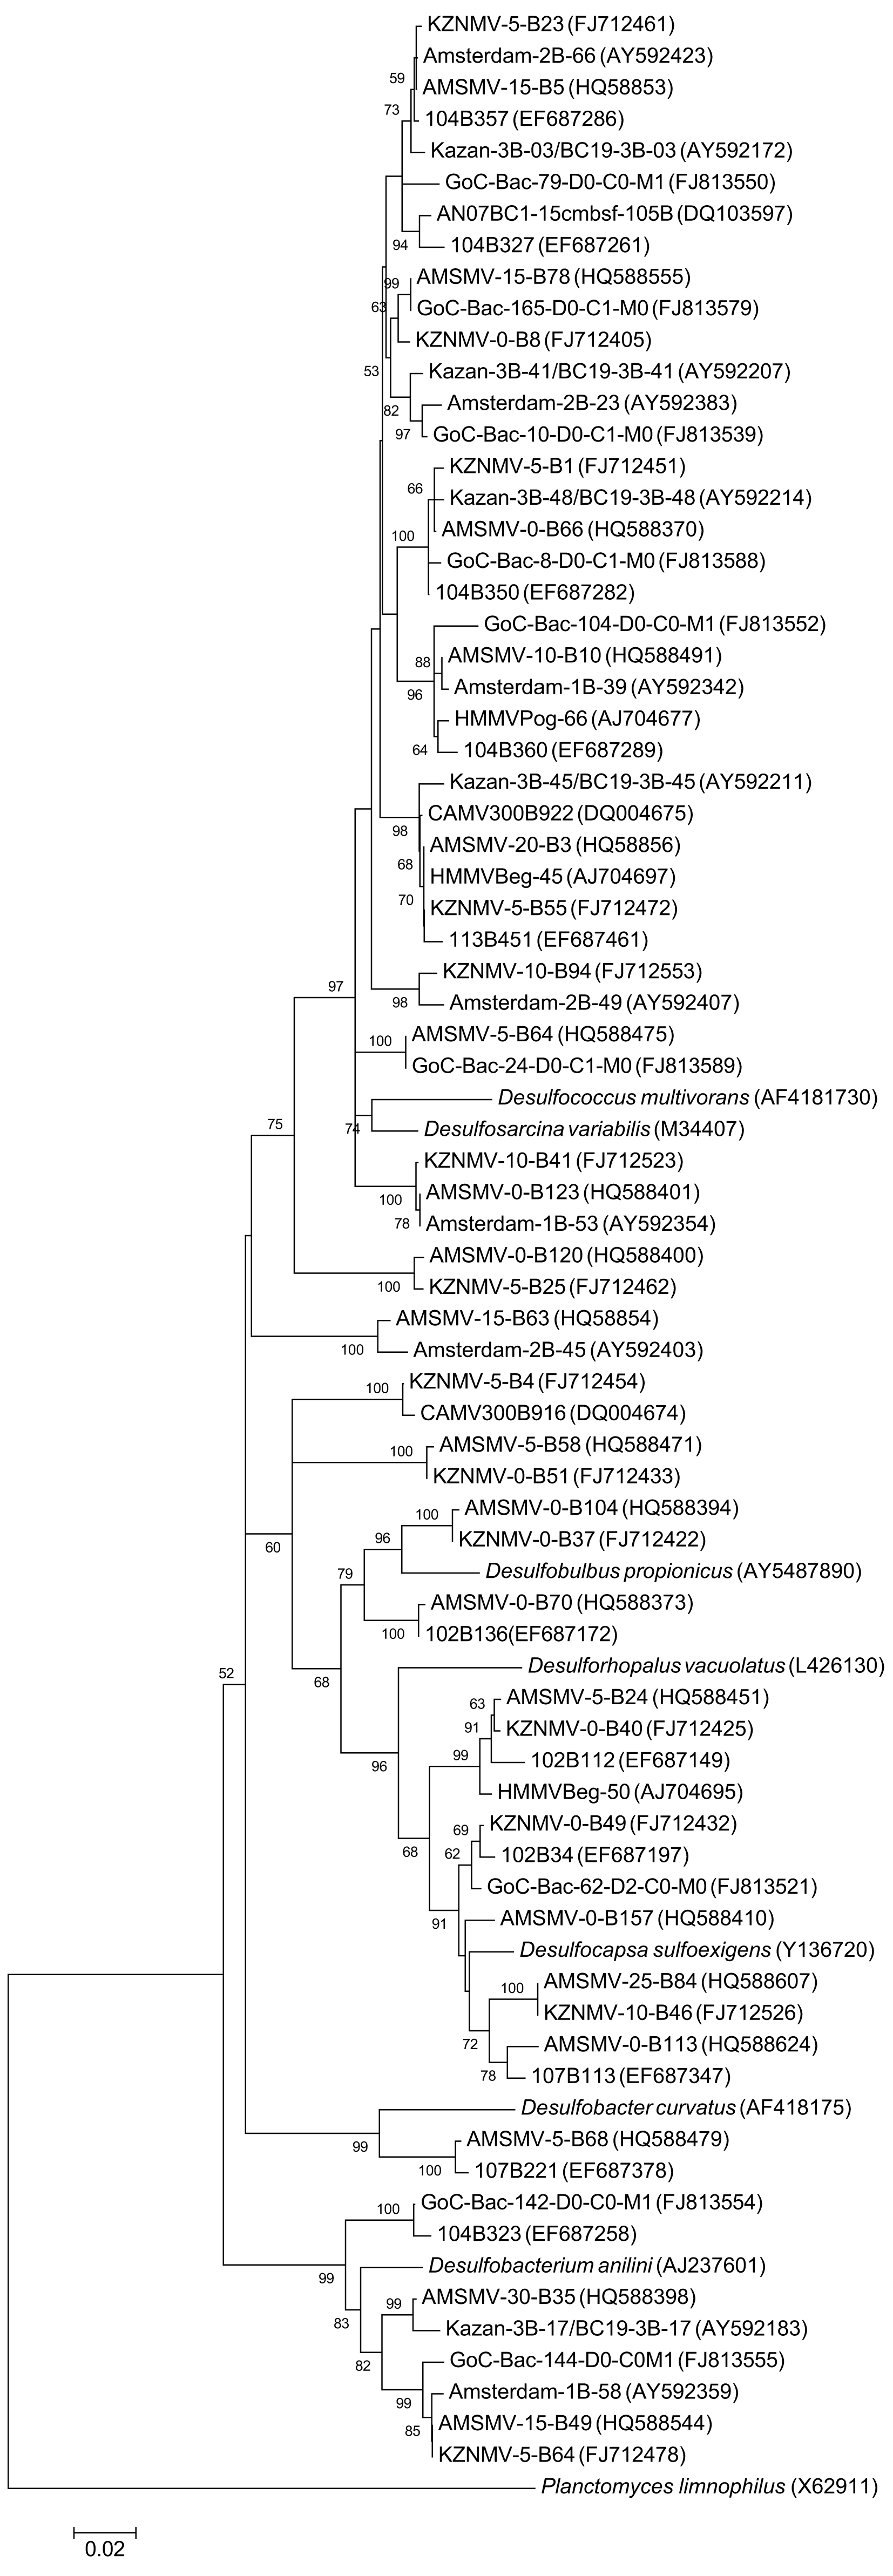


**Figure S3**. Phylogenetic tree of the δ-Proteobacteria16S rRNA gene sequences (ca. 700 bp) shared between the investigated mud volcanoes, based on the neighbour-joining method as determined by distance Jukes-Cantor analysis. One thousand bootstrap analyses (distance) were conducted and percentages greater than 50% is indicated at nodes. GenBank accession numbers are in brackets. Scale bar represents 2% estimated distance.


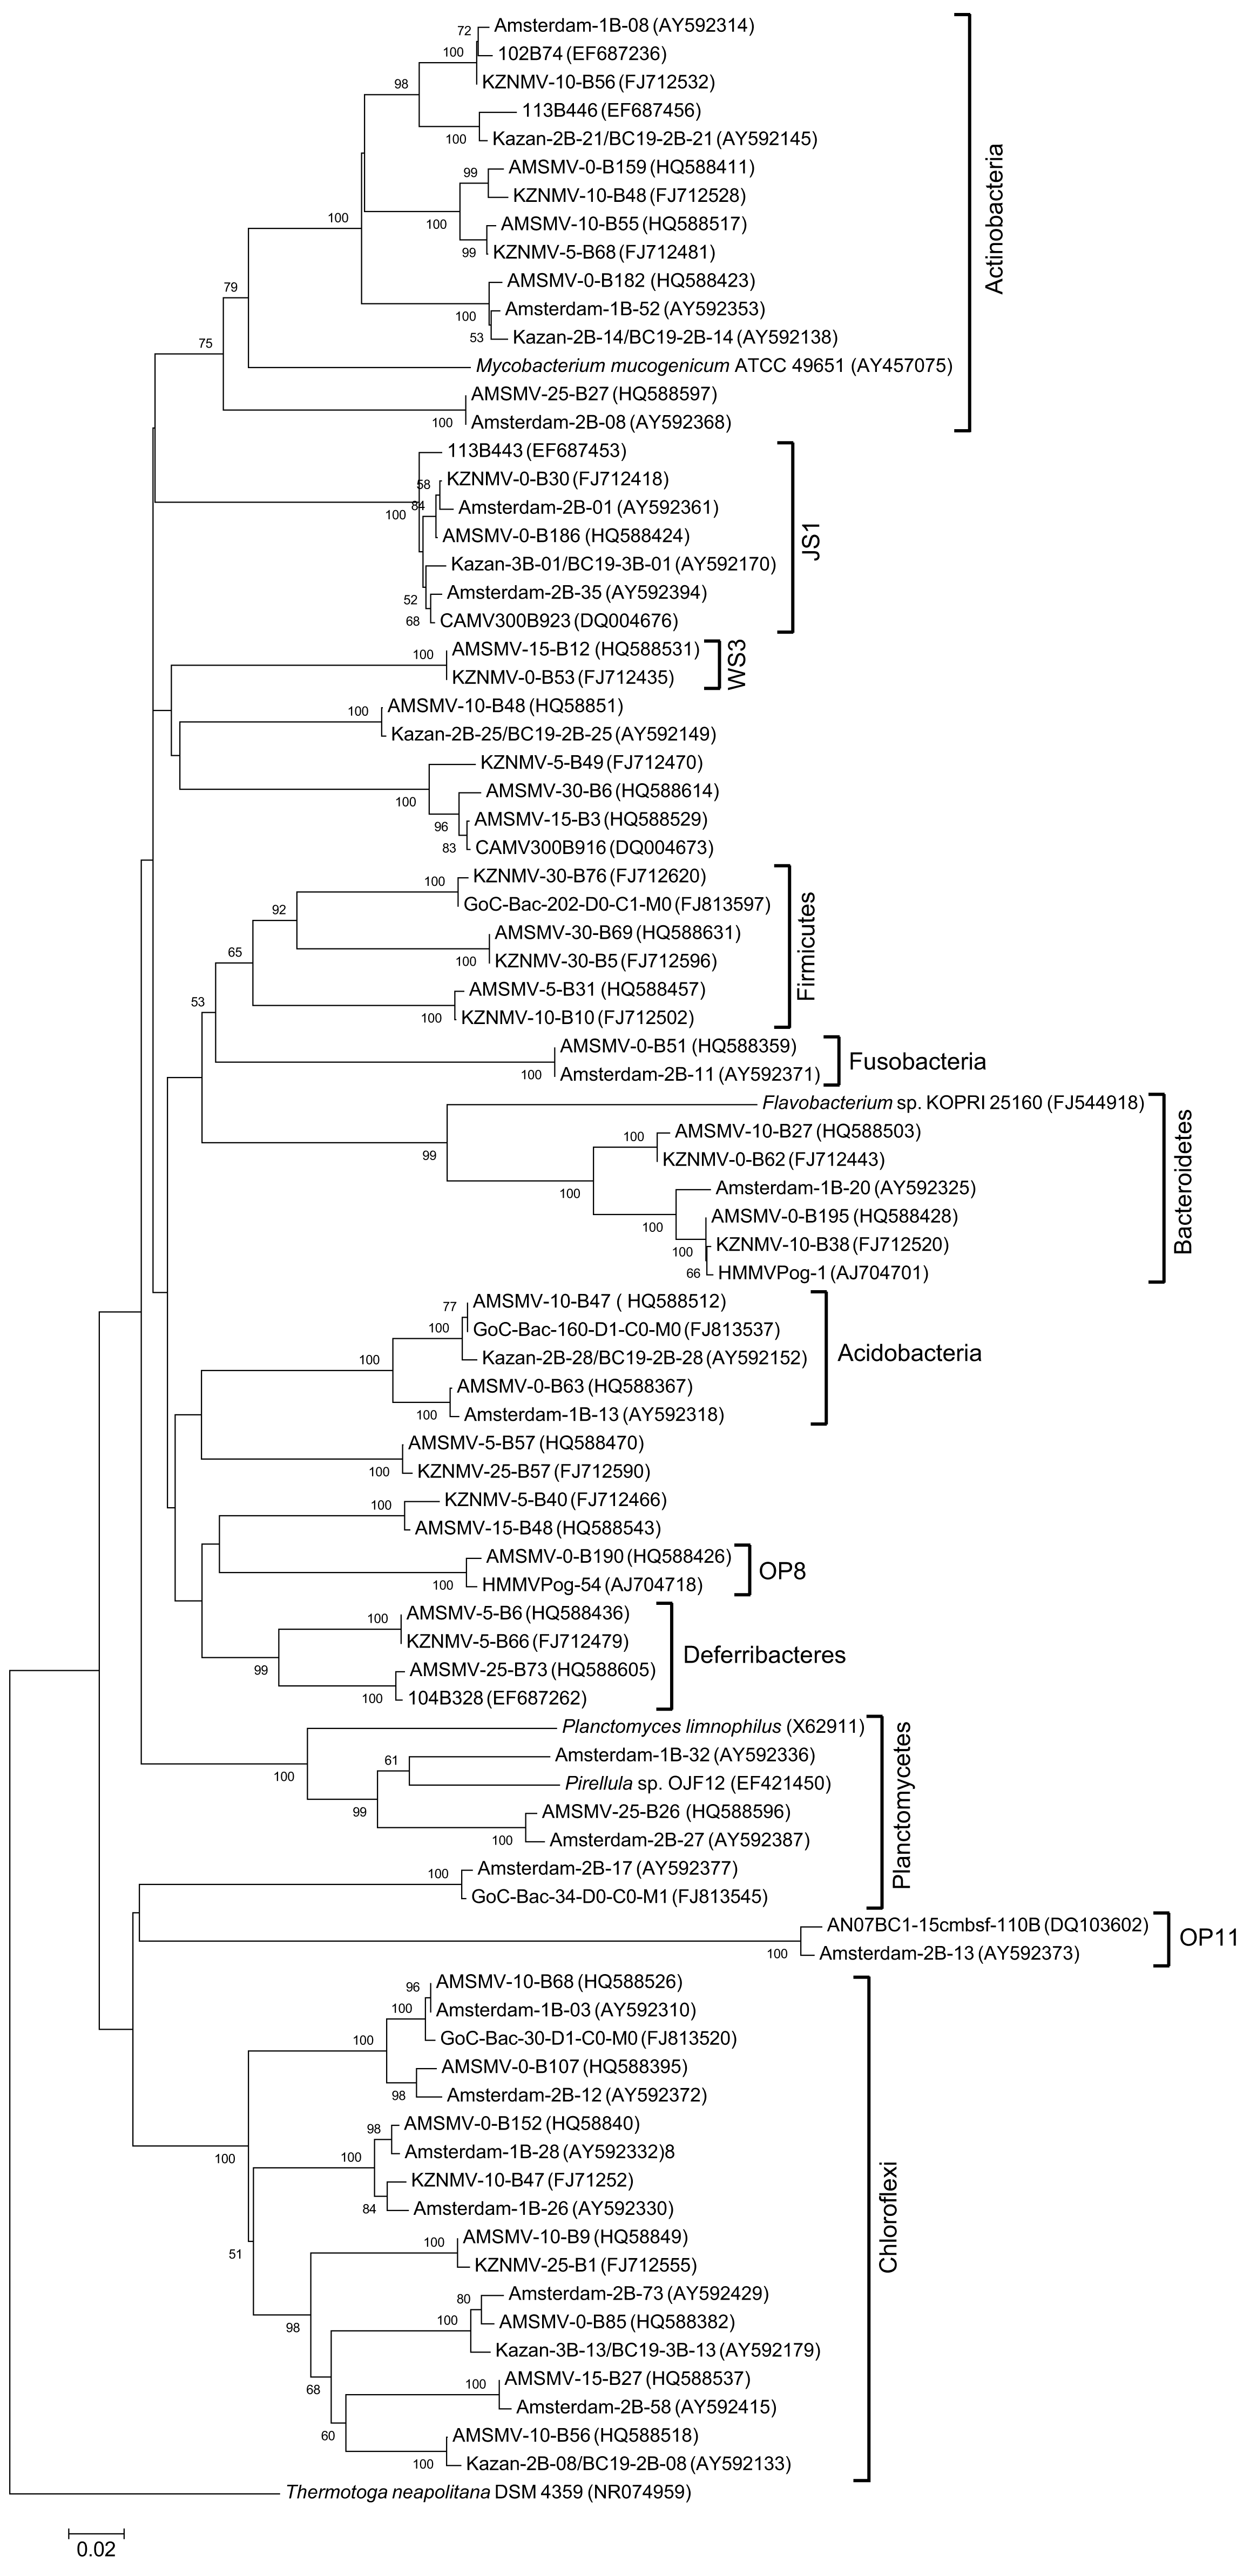


**Figure S4**. Phylogenetic tree of the Bacteria16S rRNA gene sequences (ca. 700 bp) –excluding the Proteobacteria– shared between the investigated mud volcanoes, based on the neighbour-joining method as determined by distance Jukes-Cantor analysis. One thousand bootstrap analyses (distance) were conducted and percentages greater than 50% is indicated at nodes. GenBank accession numbers are in brackets. Scale bar represents 2% estimated distance.
